# Supplementary material
Source: HighWire-hosted journal article supplement (https://bjo.bmj.com/content/102/5/575)
Supplement: inline-supplementary-material-2 [file inline-supplementary-material-2.xlsx]

## Sheet: Table 2 50 years and older
			CRUDE PREVALENCE (%)																											AGE-STANDARDISED PREVALENCE (%)
			ALL CAUSES COMBINED	ALL CAUSES COMBINED	ALL CAUSES COMBINED	CATARACT	CATARACT	CATARACT	DIABETIC RETINOPATHY	DIABETIC RETINOPATHY	DIABETIC RETINOPATHY	AGE-RELATED MACULAR DEGENERATION	AGE-RELATED MACULAR DEGENERATION	AGE-RELATED MACULAR DEGENERATION	OTHER	OTHER	OTHER	GLAUCOMA	GLAUCOMA	GLAUCOMA	UNCORRECTED REFRACTIVE ERROR	UNCORRECTED REFRACTIVE ERROR	UNCORRECTED REFRACTIVE ERROR	CORNEAL OPACITY	CORNEAL OPACITY	CORNEAL OPACITY	TRACHOMA	TRACHOMA	TRACHOMA	ALL CAUSES COMBINED	ALL CAUSES COMBINED	ALL CAUSES COMBINED	CATARACT	CATARACT	CATARACT	DIABETIC RETINOPATHY	DIABETIC RETINOPATHY	DIABETIC RETINOPATHY	AGE-RELATED MACULAR DEGENERATION	AGE-RELATED MACULAR DEGENERATION	AGE-RELATED MACULAR DEGENERATION	OTHER	OTHER	OTHER	GLAUCOMA	GLAUCOMA	GLAUCOMA	UNCORRECTED REFRACTIVE ERROR	UNCORRECTED REFRACTIVE ERROR
GBD REGION	year	level	Prevalence	10% Uncertainty Interval	90% Uncertainty Interval	Prevalence	10% Uncertainty Interval	90% Uncertainty Interval	Prevalence	10% Uncertainty Interval	90% Uncertainty Interval	Prevalence	10% Uncertainty Interval	90% Uncertainty Interval	Prevalence	10% Uncertainty Interval	90% Uncertainty Interval	Prevalence	10% Uncertainty Interval	90% Uncertainty Interval	Prevalence	10% Uncertainty Interval	90% Uncertainty Interval	Prevalence	10% Uncertainty Interval	90% Uncertainty Interval	Prevalence	10% Uncertainty Interval	90% Uncertainty Interval	Prevalence	10% Uncertainty Interval	90% Uncertainty Interval	Prevalence	10% Uncertainty Interval	90% Uncertainty Interval	Prevalence	10% Uncertainty Interval	90% Uncertainty Interval	Prevalence	10% Uncertainty Interval	90% Uncertainty Interval	Prevalence	10% Uncertainty Interval	90% Uncertainty Interval	Prevalence	10% Uncertainty Interval	90% Uncertainty Interval	Prevalence	10% Uncertainty Interval
Asia Pacific, High Income	1990	blind	0.779004	0.413169	1.24633	0.187553	0.0743176	0.379218	0.0238761	0.00286678	0.0787947	0.145446	0.030106	0.408259	0.185992	0.0426964	0.497673	0.108701	0.0240416	0.296452	0.101988	0.0469364	0.184379	0.0254476	0.00134292	0.0982572	0	0	0	0.774382	0.41102	1.2383	0.188145	0.0745369	0.380165	0.0238813	0.00284815	0.0789285	0.144508	0.0298931	0.405449	0.186627	0.0429471	0.498262	0.106927	0.0235401	0.291977	0.10129	0.0466434
Asia Pacific, High Income	1995	blind	0.738782	0.40484	1.15493	0.172558	0.0699316	0.342992	0.0243182	0.00298544	0.07886	0.136	0.0289175	0.37576	0.184965	0.0437752	0.484023	0.102078	0.0233059	0.272577	0.0967921	0.0460411	0.170925	0.0220705	0.00120957	0.082928	0	0	0	0.687217	0.376394	1.07471	0.159607	0.0646495	0.317309	0.02324	0.00284744	0.0754819	0.124147	0.0261278	0.344521	0.173994	0.0413178	0.454322	0.0948324	0.0216021	0.253331	0.0900692	0.0428214
Asia Pacific, High Income	2000	blind	0.688821	0.387128	1.05892	0.152619	0.0620428	0.302965	0.0248979	0.00296285	0.0812601	0.125938	0.0267506	0.346951	0.181676	0.044285	0.466123	0.0943693	0.021634	0.249764	0.0903352	0.0440663	0.156857	0.0189863	0.0010378	0.0697191	0	0	0	0.601497	0.337404	0.925747	0.130684	0.0531285	0.259429	0.0231791	0.00278647	0.0756691	0.105783	0.0220794	0.293854	0.158267	0.0384907	0.406683	0.0825429	0.0188923	0.218663	0.0789993	0.0384671
Asia Pacific, High Income	2005	blind	0.674354	0.376769	1.03429	0.143803	0.0562848	0.290477	0.0258937	0.00278083	0.08646	0.121954	0.0243725	0.341615	0.184464	0.0445992	0.472053	0.0922869	0.0202973	0.247213	0.0884884	0.0428895	0.153291	0.0174642	0.000895064	0.0642618	0	0	0	0.534066	0.297292	0.820781	0.108334	0.0423649	0.219082	0.0230615	0.00254969	0.0769387	0.0901946	0.0174686	0.255997	0.145636	0.0351421	0.373682	0.0727577	0.0159157	0.195416	0.0702612	0.0339372
Asia Pacific, High Income	2010	blind	0.699154	0.383187	1.07864	0.146958	0.0541492	0.306194	0.0262101	0.00242488	0.0902139	0.120306	0.0214435	0.351123	0.201243	0.0476725	0.518025	0.095519	0.0195047	0.263218	0.0917455	0.0436136	0.159888	0.0171716	0.000797549	0.0641054	0	0	0	0.49791	0.271304	0.770882	0.0978689	0.0360268	0.204277	0.0220498	0.00213095	0.0760848	0.0774237	0.0131858	0.229771	0.143025	0.0337675	0.369717	0.0678853	0.0137665	0.187668	0.0655635	0.030992
Asia Pacific, High Income	2015	blind	0.700529	0.367617	1.1019	0.142329	0.0476626	0.312026	0.0271371	0.00204115	0.0988822	0.116728	0.0179054	0.359595	0.211039	0.0478957	0.553303	0.0946688	0.0169946	0.273205	0.0919455	0.041831	0.163361	0.0166813	0.000658492	0.0641318	0	0	0	0.455243	0.237074	0.719186	0.0845534	0.0283133	0.185947	0.0220317	0.00178005	0.080511	0.0668158	0.00970997	0.209579	0.136163	0.0307281	0.359158	0.0620926	0.0111144	0.179681	0.0600073	0.027102
Asia Pacific, High Income	2020	blind	0.667279	0.328241	1.06707	0.125991	0.0371816	0.290818	0.030022	0.00178394	0.113949	0.111287	0.0142972	0.359224	0.207544	0.0442697	0.551897	0.0892987	0.0135787	0.270411	0.0876561	0.0374069	0.158297	0.01548	0.0004868	0.0611592	0	0	0	0.401672	0.195765	0.645695	0.0673131	0.0198444	0.156004	0.0231601	0.00152014	0.0881854	0.0580032	0.00700738	0.190789	0.122536	0.025889	0.328888	0.0544757	0.00827128	0.165766	0.0530189	0.0224245
Australasia	1990	blind	1.01085	0.450219	1.74368	0.2442	0.0812439	0.532167	0.0297761	0.00299457	0.105862	0.193653	0.0341037	0.582637	0.238348	0.0459077	0.687673	0.139662	0.0259661	0.410255	0.131802	0.0509559	0.256846	0.0334111	0.00146647	0.1397	0	0	0	0.871732	0.387881	1.50448	0.207614	0.0689451	0.452971	0.0273805	0.00274617	0.0974461	0.161692	0.0280217	0.48979	0.207568	0.0400818	0.597889	0.119052	0.0219687	0.350701	0.113763	0.0439371
Australasia	1995	blind	0.96308	0.43415	1.64444	0.22864	0.0763107	0.496248	0.0287554	0.00285762	0.101888	0.178891	0.031455	0.539068	0.239416	0.0466112	0.684386	0.132594	0.0249579	0.38664	0.125664	0.0491786	0.242373	0.0291207	0.00130441	0.119661	0	0	0	0.793594	0.356964	1.35625	0.183728	0.0611851	0.399143	0.0261292	0.00262543	0.0925589	0.139718	0.0239342	0.425823	0.199832	0.0390013	0.57001	0.108486	0.0202795	0.316937	0.103759	0.0405184
Australasia	2000	blind	0.869973	0.393267	1.49116	0.197978	0.0648847	0.437316	0.0273107	0.00255976	0.099621	0.156441	0.0268039	0.48091	0.230787	0.0453642	0.659253	0.119537	0.0221894	0.351932	0.113639	0.0446159	0.219979	0.0242809	0.00106689	0.0994274	0	0	0	0.715496	0.322405	1.22843	0.158114	0.0517747	0.349366	0.0255542	0.00246877	0.0929193	0.120087	0.019956	0.374409	0.188842	0.0369197	0.541166	0.0975599	0.0179982	0.287969	0.093726	0.0366865
Australasia	2005	blind	0.802726	0.359475	1.37443	0.178069	0.0560174	0.40048	0.0268279	0.00224835	0.100506	0.139845	0.0221764	0.440175	0.221536	0.0428683	0.63334	0.110409	0.0195384	0.329662	0.104965	0.0408349	0.203004	0.021073	0.000877916	0.0862799	0	0	0	0.647851	0.289039	1.11117	0.136691	0.0429523	0.307659	0.0253277	0.00222736	0.0945658	0.103658	0.0157984	0.331189	0.179685	0.0347747	0.514391	0.0885595	0.0155705	0.264956	0.0850071	0.0329523
Australasia	2010	blind	0.747282	0.323405	1.30357	0.158687	0.0461728	0.374056	0.0278044	0.00202875	0.107928	0.124587	0.017346	0.41245	0.218237	0.0409086	0.634974	0.101714	0.016343	0.317429	0.0978277	0.0367911	0.192663	0.0184244	0.00068379	0.0773604	0	0	0	0.590664	0.254624	1.03208	0.118935	0.0346587	0.280114	0.0252773	0.00192661	0.098143	0.0897825	0.0119681	0.301658	0.172183	0.0322019	0.502171	0.0811946	0.0130445	0.253168	0.0776169	0.0290826
Australasia	2015	blind	0.669075	0.274235	1.18857	0.131461	0.0343168	0.326391	0.029955	0.00180922	0.122307	0.110521	0.0131504	0.384855	0.203424	0.0361741	0.601562	0.0902215	0.0125853	0.294371	0.0877444	0.0312403	0.175949	0.0157481	0.00048961	0.0685707	0	0	0	0.517989	0.211405	0.921717	0.0949486	0.0248491	0.235786	0.026781	0.00170705	0.109284	0.0782137	0.00893787	0.275924	0.155446	0.0275229	0.461674	0.071243	0.0099839	0.232125	0.0681887	0.0241795
Australasia	2020	blind	0.648289	0.251168	1.17805	0.121673	0.0284133	0.319144	0.0320882	0.00158656	0.137712	0.101371	0.010004	0.375227	0.205135	0.0344678	0.620693	0.0883348	0.0106029	0.304038	0.0851209	0.0286385	0.174562	0.0145664	0.00037183	0.0648516	0	0	0	0.47732	0.184019	0.86853	0.0822579	0.0192061	0.215961	0.0270529	0.00140309	0.116217	0.0681338	0.0064603	0.25477	0.148796	0.0248878	0.451913	0.0657561	0.00789728	0.226532	0.0629033	0.0210622
Europe, Central	1990	blind	1.74979	0.423122	3.55783	0.494215	0.0894576	1.28339	0.0421311	0.00116543	0.193984	0.325018	0.0217642	1.2951	0.33641	0.018819	1.37093	0.241227	0.0177596	0.963049	0.224797	0.0465166	0.520113	0.0859932	0.00182255	0.409283	0	0	0	1.71214	0.416109	3.47787	0.487432	0.0889282	1.262	0.0428756	0.00118987	0.197821	0.315648	0.0211131	1.2599	0.335531	0.0190324	1.35923	0.232691	0.0170077	0.931515	0.219399	0.0455055
Europe, Central	1995	blind	1.60294	0.408702	3.19616	0.448669	0.0846665	1.15087	0.0448746	0.0013663	0.202035	0.288448	0.0195694	1.15086	0.322797	0.0188664	1.29301	0.218311	0.0165748	0.863904	0.206623	0.0452194	0.468227	0.0732139	0.001646	0.335524	0	0	0	1.49363	0.381836	2.97648	0.41686	0.0789564	1.06818	0.0403176	0.00119022	0.182136	0.270068	0.0184426	1.07479	0.30925	0.0184486	1.22906	0.205026	0.0156313	0.809889	0.192261	0.0421285
Europe, Central	2000	blind	1.42424	0.377542	2.8217	0.381277	0.073429	0.981148	0.0406418	0.00122765	0.182696	0.248596	0.0165495	1.00699	0.312468	0.0194439	1.23202	0.197182	0.015373	0.779395	0.184239	0.0420069	0.414257	0.0598315	0.00138422	0.26895	0	0	0	1.31018	0.347915	2.59473	0.353417	0.0682885	0.907982	0.0378041	0.00112164	0.170277	0.228629	0.0153378	0.922961	0.283523	0.017555	1.12007	0.180024	0.0139526	0.71294	0.169314	0.0386399
Europe, Central	2005	blind	1.27982	0.34904	2.50819	0.338874	0.0659068	0.871248	0.0374602	0.00106804	0.167377	0.219636	0.0141579	0.894313	0.285385	0.0179871	1.12066	0.181781	0.0140569	0.719989	0.16596	0.0389939	0.368873	0.0507273	0.00115014	0.223838	0	0	0	1.16191	0.316973	2.27648	0.303853	0.0588938	0.78309	0.0361503	0.00103647	0.161967	0.195123	0.0125052	0.797006	0.26431	0.0168168	1.03287	0.160697	0.0122599	0.639149	0.15064	0.0353891
Europe, Central	2010	blind	1.202	0.32793	2.38308	0.309646	0.0583776	0.820695	0.0363112	0.000949873	0.166525	0.199853	0.0119996	0.840982	0.284303	0.017977	1.12844	0.171364	0.0125738	0.70073	0.15607	0.0367137	0.350787	0.0444508	0.000917491	0.196001	0	0	0	1.05408	0.287104	2.0893	0.27005	0.05092	0.715301	0.0344493	0.000909438	0.158298	0.167648	0.00980013	0.711249	0.253464	0.0161007	1.00196	0.147429	0.0106886	0.6044	0.136992	0.0321692
Europe, Central	2015	blind	1.18329	0.313075	2.41659	0.300796	0.0530815	0.836032	0.036645	0.000818423	0.177006	0.188401	0.00986489	0.840387	0.294239	0.0180793	1.20078	0.166607	0.0110172	0.714806	0.153638	0.0350439	0.355771	0.0429593	0.000765609	0.198017	0	0	0	0.961863	0.253031	1.96404	0.237702	0.0417507	0.66097	0.0331964	0.000760078	0.161063	0.143609	0.00723894	0.646785	0.24171	0.01483	0.984257	0.134897	0.00885832	0.578959	0.125285	0.0284409
Europe, Central	2020	blind	1.12743	0.287611	2.2969	0.276044	0.0448848	0.784208	0.0397712	0.000761	0.196788	0.17392	0.00775004	0.796395	0.293253	0.0173852	1.19241	0.157875	0.00921658	0.689815	0.146596	0.0322545	0.338621	0.0399668	0.000602951	0.187739	0	0	0	0.865182	0.21898	1.76202	0.202643	0.0326787	0.576283	0.0336116	0.000658321	0.167368	0.124764	0.00535299	0.576037	0.226204	0.013353	0.918791	0.122228	0.00711312	0.533534	0.112949	0.0246915
Europe, Eastern	1990	blind	1.85411	0.514526	3.70222	0.460656	0.0930665	1.19733	0.0678955	0.00229197	0.312352	0.401385	0.0339261	1.48873	0.341888	0.0220912	1.36462	0.256427	0.0212087	1.00341	0.237044	0.0563679	0.538674	0.0888185	0.00197747	0.421559	0	0	0	1.84214	0.512637	3.67456	0.462758	0.0939651	1.19864	0.0690905	0.00231739	0.319072	0.394679	0.0331462	1.47028	0.343041	0.0222774	1.36466	0.249643	0.020454	0.98061	0.235119	0.055969
Europe, Eastern	1995	blind	1.72351	0.512	3.40732	0.424491	0.0904187	1.09913	0.0697114	0.00252839	0.319198	0.370044	0.0319799	1.38438	0.327652	0.0222512	1.30283	0.233178	0.0200856	0.913476	0.221368	0.0565539	0.497101	0.0770616	0.00184164	0.358521	0	0	0	1.5773	0.468881	3.11709	0.384391	0.0820076	0.995156	0.0649209	0.00235861	0.297246	0.336381	0.0289692	1.26146	0.309815	0.0214842	1.22109	0.216185	0.0186983	0.844607	0.202501	0.0517336
Europe, Eastern	2000	blind	1.4987	0.467251	2.89181	0.345743	0.0756659	0.887038	0.0712536	0.00276573	0.31909	0.311908	0.0263702	1.1685	0.309249	0.0225717	1.18791	0.205956	0.0182438	0.796153	0.193472	0.0520242	0.423197	0.0611151	0.00149555	0.272995	0	0	0	1.35532	0.422898	2.6145	0.313952	0.0688388	0.804409	0.0614035	0.00227292	0.276684	0.283318	0.0241568	1.05684	0.276481	0.0201167	1.06379	0.185413	0.0163546	0.717609	0.174857	0.0470387
Europe, Eastern	2005	blind	1.31373	0.416986	2.49757	0.29653	0.0647184	0.755987	0.0583617	0.0020287	0.260741	0.2719	0.0217808	1.02682	0.280739	0.020733	1.06683	0.185407	0.0160601	0.712953	0.170251	0.0466735	0.366559	0.0505467	0.00119988	0.21908	0	0	0	1.19816	0.380802	2.27699	0.269721	0.0587622	0.688547	0.0582737	0.0020857	0.25973	0.243689	0.0195069	0.921296	0.258184	0.0191423	0.978532	0.165856	0.0142264	0.639852	0.155136	0.0425631
Europe, Eastern	2010	blind	1.21086	0.387057	2.28312	0.272141	0.0583157	0.697768	0.0579373	0.00192672	0.258931	0.238562	0.0175997	0.920967	0.267654	0.0196059	1.0148	0.17369	0.0144592	0.674126	0.157164	0.0434265	0.335481	0.043716	0.000951042	0.184843	0	0	0	1.09898	0.35144	2.07098	0.244805	0.0523969	0.628468	0.0541523	0.00179075	0.242321	0.210964	0.0153656	0.820362	0.251711	0.0187715	0.945965	0.153934	0.0126617	0.599532	0.142618	0.039405
Europe, Eastern	2015	blind	1.09208	0.342119	2.07417	0.228386	0.0457689	0.604863	0.0536179	0.0015433	0.248058	0.213228	0.0140516	0.849942	0.260927	0.0191856	0.987165	0.156539	0.0118951	0.624518	0.14196	0.038463	0.305174	0.0374187	0.000710913	0.159412	0	0	0	0.974724	0.304734	1.8516	0.204758	0.0411367	0.541042	0.0530333	0.00156617	0.245444	0.181245	0.0115375	0.730483	0.231863	0.0169048	0.878386	0.137074	0.0103014	0.548358	0.126881	0.0343115
Europe, Eastern	2020	blind	1.03453	0.314297	1.98107	0.214097	0.0399652	0.585056	0.0583768	0.00146603	0.276798	0.195814	0.0109697	0.816489	0.24948	0.0173738	0.959327	0.146675	0.00987197	0.60496	0.134681	0.03538	0.291943	0.0354082	0.000566352	0.15408	0	0	0	0.876692	0.265362	1.67874	0.17499	0.0325244	0.479071	0.0528834	0.00136159	0.251641	0.158507	0.00858847	0.66764	0.21826	0.0154059	0.833443	0.124925	0.00840574	0.51422	0.114401	0.0299583
Europe, Western	1990	blind	0.90561	0.513644	1.37308	0.22493	0.0953344	0.430448	0.0219452	0.00270112	0.0686903	0.17348	0.0390997	0.458537	0.212217	0.0519387	0.538389	0.124489	0.0295027	0.322203	0.118283	0.0582267	0.20256	0.0302651	0.00166998	0.111666	0	0	0	0.724702	0.410354	1.09975	0.176159	0.0745474	0.337381	0.0205413	0.00260659	0.0640507	0.129196	0.0280765	0.346916	0.172754	0.0424323	0.437527	0.0981972	0.0230611	0.254789	0.0948539	0.046617
Europe, Western	1995	blind	0.841519	0.488936	1.25933	0.204265	0.0876834	0.388613	0.023463	0.00297914	0.0730042	0.156672	0.0356292	0.41275	0.207497	0.0518739	0.520744	0.113588	0.0274146	0.291181	0.110028	0.0555009	0.185933	0.0260068	0.00148032	0.0938144	0	0	0	0.645336	0.373997	0.967255	0.150641	0.0646264	0.286714	0.0202692	0.00262451	0.0630425	0.111418	0.0244355	0.298526	0.162026	0.040722	0.405423	0.0875865	0.0211064	0.224468	0.0846325	0.0425855
Europe, Western	2000	blind	0.769208	0.44832	1.14756	0.177463	0.0747579	0.341648	0.0225426	0.00270391	0.0715701	0.137292	0.0301667	0.367885	0.20562	0.0522758	0.50982	0.103675	0.0247345	0.266	0.100702	0.0509455	0.169638	0.0219135	0.00122415	0.0783574	0	0	0	0.579493	0.336781	0.866067	0.128204	0.0541135	0.2466	0.0197669	0.00245526	0.0625504	0.0952699	0.0202457	0.25938	0.152068	0.0383566	0.379251	0.0781746	0.0186082	0.20084	0.0761239	0.0384057
Europe, Western	2005	blind	0.720504	0.413117	1.08255	0.16429	0.0662592	0.32375	0.022268	0.00238913	0.0732045	0.123888	0.0251584	0.343182	0.197458	0.0487235	0.49614	0.0989287	0.0224874	0.258997	0.0944481	0.0470083	0.160208	0.0192234	0.00102519	0.0693095	0	0	0	0.527667	0.301626	0.794175	0.112444	0.0452942	0.221953	0.0195226	0.00219237	0.0640408	0.0825022	0.0160636	0.232149	0.145868	0.0361485	0.366513	0.0716677	0.0161602	0.188234	0.069407	0.034443
Europe, Western	2010	blind	0.693017	0.382076	1.0628	0.151888	0.0564414	0.314273	0.0222282	0.00203801	0.0757442	0.113268	0.0200068	0.330364	0.202833	0.0484209	0.519263	0.0948832	0.0195382	0.260243	0.0909248	0.0435052	0.1574	0.0169917	0.000805214	0.0624982	0	0	0	0.490875	0.269719	0.754128	0.101736	0.0378509	0.210345	0.0190875	0.00184077	0.0651503	0.0716055	0.0120461	0.212421	0.143966	0.0343218	0.369155	0.0672809	0.0137966	0.184635	0.0646291	0.0308238
Europe, Western	2015	blind	0.666374	0.348264	1.0515	0.142728	0.0478018	0.313497	0.0219881	0.00160802	0.0801669	0.102566	0.0153003	0.319453	0.205526	0.046541	0.539867	0.0899778	0.0161267	0.260799	0.0874245	0.0396498	0.155719	0.0161637	0.000645103	0.0621278	0	0	0	0.454273	0.236323	0.718401	0.0893783	0.0299848	0.19648	0.0188326	0.0014889	0.0687844	0.0615302	0.00872628	0.194476	0.138532	0.0312453	0.365696	0.0619698	0.0110964	0.179735	0.0598621	0.0270297
Europe, Western	2020	blind	0.621655	0.304128	1.01484	0.126179	0.0374289	0.29624	0.0238476	0.00140015	0.0917311	0.0927363	0.0115022	0.309511	0.19885	0.0421402	0.540324	0.0837968	0.0126917	0.259253	0.0816462	0.0346591	0.150455	0.0145978	0.000471143	0.0586231	0	0	0	0.410679	0.199903	0.671924	0.075007	0.0222461	0.176385	0.0195348	0.00124684	0.0754742	0.0536502	0.00631442	0.181512	0.129578	0.0273664	0.353836	0.0561281	0.00851057	0.173992	0.0541816	0.0228894
North America, High Income	1990	blind	1.17082	0.541938	2.02481	0.273972	0.0943022	0.600311	0.0367713	0.00376048	0.131554	0.240685	0.0460326	0.711084	0.269409	0.0539191	0.778514	0.158594	0.0306005	0.467571	0.152095	0.0609843	0.297115	0.039293	0.00173276	0.16599	0	0	0	0.908997	0.419314	1.57532	0.204666	0.0702408	0.449706	0.0322465	0.00336079	0.115087	0.175494	0.0324489	0.527122	0.210114	0.042054	0.607824	0.122309	0.0234345	0.361834	0.118516	0.0473815
North America, High Income	1995	blind	1.10768	0.517773	1.88581	0.254516	0.0876116	0.552818	0.0347763	0.00351542	0.123873	0.219269	0.0414964	0.646564	0.271616	0.0550427	0.771477	0.149335	0.0289942	0.434853	0.144019	0.0583185	0.276933	0.0341461	0.00153051	0.140959	0	0	0	0.834319	0.38813	1.42416	0.182944	0.0628433	0.397949	0.0305868	0.00320173	0.108507	0.152305	0.0276645	0.457817	0.204209	0.0412242	0.581808	0.112278	0.0216813	0.327624	0.108976	0.0439433
North America, High Income	2000	blind	0.987271	0.465489	1.67247	0.219993	0.0748755	0.481903	0.0327322	0.00313934	0.118347	0.188205	0.0342665	0.565634	0.255845	0.052323	0.722237	0.133759	0.0257341	0.389893	0.128562	0.0525194	0.245892	0.0281737	0.00125771	0.114664	0	0	0	0.759071	0.356116	1.2889	0.160017	0.054384	0.35081	0.0299152	0.00302036	0.107592	0.132062	0.0230523	0.404935	0.195825	0.0398674	0.554925	0.102332	0.0195625	0.299243	0.0993247	0.0403997
North America, High Income	2005	blind	0.86934	0.402906	1.46447	0.186859	0.0605623	0.414875	0.03138	0.00270542	0.115392	0.158162	0.0263457	0.486836	0.238696	0.047984	0.669819	0.117822	0.0214112	0.346896	0.113418	0.0455496	0.215795	0.0230034	0.00097473	0.0929056	0	0	0	0.694773	0.320604	1.17286	0.141214	0.0457906	0.313504	0.0296431	0.00271431	0.108505	0.115182	0.0183609	0.360721	0.189803	0.0380098	0.534709	0.0944649	0.0171284	0.278307	0.0910596	0.0364399
North America, High Income	2010	blind	0.799913	0.359304	1.35781	0.16826	0.0507001	0.3864	0.0310454	0.00234546	0.117396	0.134736	0.0194952	0.433806	0.233383	0.0454647	0.659592	0.107898	0.017941	0.327846	0.104475	0.0406532	0.200267	0.0201155	0.000769241	0.0827675	0	0	0	0.650242	0.290791	1.10583	0.128341	0.0387519	0.294572	0.0289259	0.00230505	0.109211	0.100165	0.0138713	0.327206	0.187899	0.0364628	0.533319	0.0889907	0.014826	0.270006	0.0853229	0.0330797
North America, High Income	2015	blind	0.744154	0.317028	1.29053	0.149818	0.0407057	0.362314	0.0322417	0.00203172	0.129315	0.117955	0.014385	0.403122	0.228897	0.0423307	0.660325	0.100114	0.0145094	0.319167	0.097346	0.035922	0.190653	0.0177814	0.000578476	0.0752048	0	0	0	0.598763	0.253945	1.04057	0.11219	0.0305573	0.271609	0.0292491	0.00193258	0.117271	0.0875119	0.0102773	0.302577	0.181221	0.0333569	0.525583	0.08244	0.0120225	0.262471	0.0786704	0.0289247
North America, High Income	2020	blind	0.73034	0.293106	1.30373	0.140693	0.0342157	0.361426	0.0346341	0.00177154	0.145742	0.1085	0.0109706	0.396286	0.234808	0.0409102	0.697362	0.0994909	0.0123486	0.336558	0.0956761	0.0332727	0.192865	0.0165379	0.000442811	0.0719714	0	0	0	0.557597	0.222655	0.99695	0.0989835	0.0240411	0.254637	0.0295269	0.00156651	0.124611	0.0766045	0.00747776	0.282373	0.175999	0.0305016	0.525155	0.0770858	0.00958415	0.260989	0.0733377	0.0253922
Asia Pacific, High Income	1990	sm	5.88138	3.05887	9.2707	1.03699	0.400861	2.08827	0.177394	0.0218683	0.579987	0.747202	0.1421	2.14329	0.73594	0.134827	2.06167	0.213538	0.0398068	0.631724	2.90586	1.44833	4.73886	0.0644555	0.00350045	0.230912	0	0	0	5.81293	3.02555	9.15891	1.02734	0.397521	2.06743	0.176623	0.0216659	0.57804	0.735598	0.139566	2.11073	0.732514	0.13447	2.04952	0.208952	0.0388341	0.618523	2.87016	1.4307
Asia Pacific, High Income	1995	sm	5.79568	3.15541	8.99461	0.987453	0.395481	1.96877	0.189841	0.0244242	0.612419	0.7267	0.145874	2.05641	0.761038	0.145676	2.10066	0.207651	0.0406794	0.600651	2.86576	1.49857	4.59426	0.0572378	0.00338596	0.201887	0	0	0	5.46819	2.96895	8.49891	0.921971	0.368511	1.84053	0.183325	0.0234539	0.59268	0.670192	0.132762	1.90764	0.727016	0.139231	2.00675	0.195451	0.0381292	0.566664	2.70855	1.41363
Asia Pacific, High Income	2000	sm	5.63506	3.13608	8.65553	0.906194	0.364732	1.81294	0.204434	0.0252441	0.660732	0.703426	0.142104	1.98551	0.780092	0.153029	2.12863	0.200751	0.0393852	0.576497	2.78928	1.49296	4.4213	0.0508825	0.00310182	0.180358	0	0	0	5.10083	2.82125	7.86224	0.803142	0.321916	1.61095	0.195443	0.0241903	0.632433	0.608743	0.120083	1.73722	0.70765	0.138072	1.93702	0.181131	0.0352754	0.522349	2.53537	1.35155
Asia Pacific, High Income	2005	sm	5.69909	3.1568	8.75492	0.87878	0.343712	1.78742	0.222177	0.0245435	0.742232	0.706395	0.136672	2.01082	0.819318	0.159655	2.23832	0.203991	0.0382508	0.592765	2.82039	1.50238	4.47101	0.0480313	0.00275931	0.172853	0	0	0	4.81902	2.63996	7.45047	0.707225	0.274396	1.44579	0.207566	0.0231861	0.694073	0.552022	0.102559	1.60085	0.69609	0.134482	1.9114	0.170205	0.0314725	0.498148	2.40197	1.27013
Asia Pacific, High Income	2010	sm	5.99638	3.23794	9.2905	0.913357	0.337182	1.91196	0.232488	0.02186	0.807163	0.711931	0.124916	2.08978	0.911733	0.172924	2.51299	0.216061	0.0371663	0.646145	2.96243	1.53631	4.74121	0.0483728	0.00252679	0.177501	0	0	0	4.69711	2.49562	7.34585	0.668828	0.244249	1.40934	0.209448	0.0199684	0.73016	0.495623	0.0821654	1.49118	0.719822	0.134843	1.99938	0.16672	0.0281727	0.504302	2.34428	1.20262
Asia Pacific, High Income	2015	sm	6.1518	3.20055	9.65172	0.901801	0.306564	1.9621	0.250616	0.0190144	0.911716	0.713616	0.108358	2.18093	0.979324	0.178806	2.73418	0.221628	0.0334256	0.690151	3.03629	1.51431	4.92791	0.0485225	0.00217698	0.180125	0	0	0	4.52962	2.30498	7.19339	0.607934	0.203629	1.33351	0.224038	0.0175489	0.821415	0.452762	0.0638693	1.42378	0.725799	0.130238	2.04734	0.162223	0.0239757	0.5118	2.26482	1.11275
Asia Pacific, High Income	2020	sm	6.10135	2.99459	9.84772	0.820076	0.248789	1.8949	0.29106	0.0172567	1.12574	0.711723	0.0898456	2.31826	0.998326	0.172233	2.86506	0.220312	0.0277525	0.736826	3.01269	1.4143	5.03603	0.0471698	0.00168028	0.183883	0	0	0	4.28047	2.04231	7.00681	0.513364	0.152663	1.19818	0.253703	0.0158078	0.98979	0.421521	0.0488372	1.41877	0.697455	0.117347	2.02745	0.153672	0.0189019	0.521938	2.1457	0.988177
Australasia	1990	sm	7.58301	3.43852	12.8219	1.34799	0.454856	2.90922	0.226796	0.024223	0.795407	1.00682	0.170074	3.07377	0.941162	0.150196	2.82925	0.276786	0.045091	0.87777	3.69976	1.57768	6.53351	0.0836922	0.00393089	0.321773	0	0	0	6.72801	3.02982	11.4162	1.17016	0.392402	2.53526	0.213666	0.0225716	0.752698	0.855383	0.141046	2.64103	0.846456	0.134476	2.54949	0.241913	0.0388942	0.771515	3.29663	1.40008
Australasia	1995	sm	7.41261	3.48054	12.492	1.29552	0.44871	2.79939	0.226053	0.024586	0.794812	0.954993	0.16735	2.91904	0.975584	0.160903	2.92517	0.268546	0.0454905	0.841256	3.61734	1.60023	6.36272	0.0745715	0.00376225	0.285591	0	0	0	6.41347	2.97967	10.8695	1.0863	0.372747	2.36117	0.21385	0.0232148	0.753926	0.773452	0.130631	2.40522	0.858966	0.140811	2.58428	0.229502	0.0383164	0.724712	3.15146	1.3862
Australasia	2000	sm	6.93808	3.27309	11.4699	1.15825	0.396883	2.48756	0.225582	0.0229612	0.791549	0.864934	0.149144	2.62067	0.981423	0.163347	2.88063	0.251705	0.0420748	0.77629	3.39178	1.51214	5.84551	0.06441	0.00331371	0.245851	0	0	0	6.0725	2.82908	10.1042	0.983206	0.333663	2.12355	0.22045	0.0227759	0.773138	0.698658	0.1154	2.15934	0.857807	0.141022	2.53389	0.216567	0.0356613	0.673206	2.99332	1.32572
Australasia	2005	sm	6.6268	3.13875	10.947	1.07392	0.36084	2.34131	0.231857	0.0211493	0.833114	0.798448	0.131807	2.45463	0.978518	0.162747	2.87529	0.24072	0.0387862	0.751007	3.2456	1.45419	5.58328	0.0577264	0.00287789	0.222563	0	0	0	5.76574	2.69229	9.59537	0.890688	0.295847	1.95417	0.229925	0.0215719	0.825156	0.63173	0.0990724	1.98614	0.859819	0.141682	2.53986	0.206302	0.0327322	0.648634	2.85058	1.26799
Australasia	2010	sm	6.39761	2.9719	10.6801	0.988375	0.314996	2.22594	0.251859	0.0201358	0.946486	0.733944	0.110241	2.33067	1.00021	0.163382	2.96724	0.230858	0.0341041	0.741787	3.13975	1.38081	5.45418	0.0526131	0.00239652	0.206954	0	0	0	5.49978	2.5152	9.25642	0.808565	0.254881	1.831	0.240973	0.0196408	0.907563	0.57147	0.0812582	1.85579	0.863823	0.13943	2.58077	0.198298	0.028915	0.642756	2.72635	1.18951
Australasia	2015	sm	6.05609	2.69505	10.3183	0.854013	0.248719	2.01925	0.286102	0.0187482	1.13248	0.687866	0.0884389	2.29077	0.979629	0.153536	2.9642	0.217551	0.0278755	0.73652	2.98351	1.25821	5.28398	0.0474209	0.0018461	0.1918	0	0	0	5.12215	2.24033	8.79941	0.679678	0.1955	1.61587	0.271516	0.0182511	1.07847	0.528501	0.0642881	1.79672	0.826656	0.127594	2.52078	0.185802	0.0235265	0.633998	2.54874	1.06496
Australasia	2020	sm	6.089	2.59568	10.5155	0.818111	0.217352	2.01422	0.317575	0.0169224	1.31203	0.65615	0.0705173	2.30276	1.024	0.153861	3.1411	0.223051	0.0245852	0.798097	3.00417	1.21275	5.39442	0.045943	0.0014773	0.190462	0	0	0	4.93102	2.06269	8.59141	0.613016	0.160417	1.5202	0.286868	0.0155308	1.19239	0.480384	0.0488464	1.72108	0.827172	0.122115	2.55806	0.180411	0.0195598	0.651616	2.45837	0.982177
Europe, Central	1990	sm	7.92242	2.44495	15.3991	1.61914	0.369355	4.07207	0.187159	0.00764563	0.860073	0.998321	0.0771402	3.90711	0.80213	0.0401208	3.50043	0.306313	0.0213105	1.27207	3.85107	1.08803	7.91202	0.158286	0.00341822	0.663752	0	0	0	7.7008	2.38203	14.9496	1.57292	0.360886	3.94608	0.188627	0.00771388	0.867602	0.957654	0.0737064	3.75891	0.792261	0.0400684	3.44632	0.294226	0.0203221	1.22139	3.73937	1.05635
Europe, Central	1995	sm	7.50959	2.41801	14.4368	1.51459	0.355867	3.80873	0.202642	0.00907202	0.921199	0.912479	0.0713944	3.59853	0.790677	0.0411592	3.42095	0.283743	0.0201897	1.17898	3.66953	1.09154	7.42184	0.135931	0.00318749	0.553897	0	0	0	6.99224	2.24972	13.4372	1.39099	0.32726	3.49778	0.183998	0.00799725	0.838455	0.849015	0.066508	3.34492	0.757737	0.0398852	3.26378	0.266694	0.018998	1.10732	3.41729	1.01483
Europe, Central	2000	sm	6.90663	2.29324	13.1627	1.32793	0.314715	3.35968	0.191478	0.00865004	0.866993	0.82194	0.0632546	3.27701	0.792921	0.043272	3.38655	0.266073	0.0192433	1.10099	3.39199	1.0491	6.7726	0.114299	0.00279117	0.453689	0	0	0	6.37546	2.1119	12.1506	1.22425	0.290265	3.09564	0.180261	0.0079919	0.816912	0.750191	0.0578346	2.98931	0.725255	0.0393038	3.09876	0.243032	0.0174082	1.0077	3.13375	0.966824
Europe, Central	2005	sm	6.36437	2.09667	11.9189	1.20193	0.277442	3.02702	0.182041	0.00746885	0.810673	0.747342	0.0542092	2.99299	0.748609	0.0400137	3.14922	0.250468	0.0173233	1.03517	3.13611	0.967978	6.13854	0.0978653	0.00229507	0.381585	0	0	0	5.86974	1.92343	11.0047	1.08875	0.249231	2.75242	0.179582	0.00741685	0.801957	0.665828	0.047518	2.68177	0.703177	0.0377178	2.95532	0.224927	0.0153102	0.931449	2.89872	0.891143
Europe, Central	2010	sm	6.07658	1.97058	11.3972	1.11987	0.246047	2.883	0.182507	0.00665325	0.814671	0.687497	0.0460377	2.8206	0.759039	0.0400234	3.19849	0.241078	0.0156012	1.01417	2.99995	0.914157	5.87549	0.0866392	0.00192195	0.338237	0	0	0	5.50234	1.76847	10.3424	0.996998	0.217539	2.57204	0.177086	0.00646717	0.79237	0.590517	0.0380679	2.45008	0.697851	0.0367196	2.94023	0.213101	0.013569	0.898029	2.72674	0.826115
Europe, Central	2015	sm	6.05418	1.8727	11.3596	1.09955	0.221602	2.89037	0.188888	0.00567273	0.851148	0.656795	0.0381251	2.77304	0.795679	0.0400514	3.35496	0.239285	0.0137008	1.03013	2.99073	0.86914	5.86285	0.0832537	0.00162761	0.332112	0	0	0	5.19903	1.58346	9.78492	0.911646	0.181265	2.40513	0.177413	0.00536467	0.803364	0.524956	0.0289258	2.24491	0.693992	0.0346059	2.92708	0.203334	0.0114556	0.876414	2.58423	0.743954
Europe, Central	2020	sm	5.92944	1.68985	11.2598	1.02858	0.181832	2.80983	0.212356	0.00512026	0.983367	0.627258	0.0297822	2.7584	0.812286	0.0377143	3.46697	0.234961	0.011245	1.0468	2.93526	0.78682	5.82119	0.0787399	0.00124298	0.321953	0	0	0	4.87174	1.35986	9.27475	0.80525	0.13955	2.21001	0.189289	0.00455664	0.882291	0.47725	0.0214629	2.12262	0.67724	0.0309318	2.88854	0.193393	0.00908285	0.86275	2.42955	0.642653
Europe, Eastern	1990	sm	10.8926	4.05	19.2385	1.95665	0.523559	4.53637	0.421242	0.0217258	1.77812	1.64109	0.166837	5.60222	1.08424	0.0656348	4.297	0.440991	0.0359689	1.67808	5.13264	1.71129	9.73466	0.215752	0.00521716	0.835797	0	0	0	10.8055	4.01993	19.0824	1.95639	0.524819	4.52968	0.422828	0.0216567	1.78716	1.60733	0.161542	5.51821	1.07799	0.0654773	4.26838	0.428181	0.0345629	1.63326	5.09004	1.69642
Europe, Eastern	1995	sm	10.6143	4.14824	18.524	1.89802	0.526884	4.40638	0.434413	0.0238167	1.81045	1.5724	0.16299	5.42289	1.07009	0.0672211	4.2083	0.412142	0.0341449	1.56932	5.03754	1.78797	9.37656	0.189682	0.00492085	0.710686	0	0	0	9.77694	3.80827	17.0815	1.70597	0.473237	3.96342	0.410954	0.022528	1.71637	1.43286	0.146902	4.96547	1.0234	0.0651393	4.01028	0.386397	0.0320076	1.47144	4.64829	1.64543
Europe, Eastern	2000	sm	9.72428	3.90946	16.9899	1.60795	0.447763	3.79028	0.465443	0.0274338	1.94502	1.39387	0.13741	4.94111	1.06131	0.0701649	4.16047	0.38455	0.0320306	1.4686	4.6546	1.71696	8.6197	0.156558	0.00418659	0.574782	0	0	0	8.84612	3.54361	15.4749	1.45463	0.4048	3.43057	0.405552	0.0226745	1.70641	1.26388	0.125186	4.47763	0.957978	0.0627566	3.75884	0.346041	0.0286049	1.3247	4.24219	1.55999
Europe, Eastern	2005	sm	8.85283	3.60115	15.5654	1.42627	0.394167	3.43855	0.392764	0.0203208	1.68021	1.27439	0.120117	4.64045	1.00477	0.0664689	3.96522	0.356086	0.0290533	1.39051	4.26497	1.60021	7.91702	0.133578	0.00348375	0.491688	0	0	0	8.13964	3.29625	14.3369	1.29871	0.356634	3.13993	0.400179	0.0213458	1.70988	1.13311	0.105555	4.1505	0.933518	0.061841	3.68792	0.321989	0.025852	1.25889	3.93027	1.46929
Europe, Eastern	2010	sm	8.26466	3.33945	14.6263	1.3227	0.352146	3.26442	0.399254	0.0192492	1.72494	1.12042	0.0962131	4.24353	0.975071	0.0635969	3.88631	0.33757	0.0261207	1.34429	3.99372	1.49182	7.45211	0.115927	0.00291423	0.432367	0	0	0	7.67104	3.07722	13.618	1.2022	0.317303	2.98049	0.38277	0.018388	1.65805	1.0038	0.0837467	3.84911	0.93224	0.0611875	3.71219	0.305442	0.0232933	1.22388	3.72162	1.38409
Europe, Eastern	2015	sm	7.68206	2.97181	13.7016	1.14024	0.277085	2.91427	0.388899	0.0156161	1.71849	1.02874	0.0776721	4.04081	0.977219	0.0619747	3.90852	0.31736	0.0217511	1.30893	3.72802	1.33653	6.9996	0.101583	0.00222765	0.387218	0	0	0	7.11652	2.72554	12.7418	1.05006	0.253731	2.68833	0.390663	0.0159035	1.73307	0.903204	0.0649474	3.60743	0.900159	0.0564191	3.61417	0.285964	0.0192715	1.18158	3.47179	1.23807
Europe, Eastern	2020	sm	7.53924	2.71181	13.6834	1.09573	0.236516	2.91665	0.432942	0.014246	1.97959	0.973209	0.0602254	4.02591	0.961088	0.0557037	3.92865	0.306932	0.0176148	1.32129	3.67247	1.22638	7.01094	0.0968674	0.00171712	0.376771	0	0	0	6.67554	2.37188	12.1636	0.931723	0.198736	2.49166	0.4049	0.0134437	1.86394	0.820661	0.048566	3.44423	0.882493	0.0512964	3.60509	0.272854	0.0155432	1.17616	3.27099	1.08516
Europe, Western	1990	sm	6.11127	3.34021	9.34161	1.10829	0.449157	2.16382	0.149509	0.018789	0.475786	0.808374	0.164351	2.22795	0.74264	0.14245	2.02088	0.219313	0.0431891	0.629549	3.01553	1.58565	4.75968	0.0676191	0.00374725	0.236459	0	0	0	5.16441	2.80026	7.92913	0.909591	0.366444	1.78339	0.145179	0.0185456	0.461477	0.627143	0.121662	1.76678	0.640457	0.122571	1.74577	0.18152	0.035258	0.524256	2.56482	1.3421
Europe, Western	1995	sm	5.91363	3.27923	9.00425	1.04545	0.425211	2.04687	0.16452	0.021214	0.521633	0.757184	0.156375	2.0887	0.757298	0.147108	2.054	0.207412	0.0414057	0.586788	2.92202	1.56094	4.58956	0.0597545	0.00349326	0.208534	0	0	0	4.85725	2.66717	7.43697	0.820334	0.331395	1.61376	0.149697	0.0193439	0.475618	0.57068	0.112519	1.60842	0.638333	0.123833	1.73471	0.170214	0.0336229	0.485285	2.4191	1.28461
Europe, Western	2000	sm	5.64454	3.11752	8.60912	0.948671	0.378183	1.8841	0.167329	0.0201236	0.539245	0.695537	0.139764	1.94544	0.787381	0.153554	2.13165	0.198886	0.0389164	0.566502	2.79431	1.48807	4.39381	0.0524256	0.00312016	0.185772	0	0	0	4.59192	2.50939	7.04612	0.738867	0.292903	1.47314	0.154999	0.0188945	0.499674	0.514644	0.0989066	1.46979	0.633906	0.122178	1.72751	0.159941	0.0309098	0.458497	2.29269	1.21315
Europe, Western	2005	sm	5.49411	2.975	8.47256	0.907739	0.347599	1.84923	0.172779	0.0182198	0.576466	0.653569	0.122602	1.88098	0.791764	0.150341	2.17465	0.196451	0.0363371	0.571561	2.72402	1.42191	4.32999	0.0477852	0.00269394	0.172536	0	0	0	4.37968	2.3437	6.79806	0.676784	0.256759	1.38662	0.161656	0.0174584	0.538316	0.465689	0.0830579	1.36994	0.641939	0.121301	1.76879	0.15342	0.0279463	0.449859	2.19125	1.13564
Europe, Western	2010	sm	5.43497	2.8436	8.58897	0.867414	0.310688	1.84996	0.180134	0.0162386	0.636942	0.612886	0.103235	1.84783	0.839368	0.154365	2.35892	0.194797	0.0327767	0.591399	2.69602	1.35733	4.39505	0.0443472	0.00227034	0.165284	0	0	0	4.2437	2.18976	6.75618	0.63734	0.226367	1.36491	0.165761	0.0152868	0.586279	0.419649	0.066568	1.29493	0.661692	0.120619	1.8697	0.15025	0.0248949	0.460491	2.12637	1.06175
Europe, Western	2015	sm	5.34939	2.67947	8.67829	0.828692	0.272258	1.85817	0.186147	0.0133904	0.698738	0.571132	0.0827487	1.81934	0.874798	0.153971	2.52341	0.191624	0.0281653	0.616071	2.65377	1.27565	4.44653	0.0432319	0.00190759	0.165854	0	0	0	4.10479	2.0214	6.71875	0.586555	0.190611	1.32245	0.173799	0.0130655	0.654739	0.378662	0.0514124	1.23496	0.671219	0.116646	1.95058	0.146396	0.0212169	0.475156	2.06008	0.980753
Europe, Western	2020	sm	5.21732	2.45879	8.73128	0.759796	0.223319	1.81143	0.212019	0.0119304	0.849507	0.539424	0.0645068	1.83018	0.884503	0.146562	2.63188	0.188561	0.0233386	0.651277	2.59191	1.17028	4.4837	0.0411084	0.00145512	0.165025	0	0	0	3.92632	1.81415	6.63235	0.518172	0.150288	1.24359	0.191313	0.0112279	0.770586	0.349278	0.0389585	1.21441	0.665281	0.108567	1.99455	0.141626	0.0172763	0.494491	1.97426	0.881276
North America, High Income	1990	sm	6.91881	3.2735	11.3231	1.17328	0.409934	2.46083	0.219274	0.0243417	0.744621	0.985504	0.179981	2.85976	0.823618	0.137045	2.39725	0.247001	0.0414222	0.760639	3.39431	1.52524	5.77939	0.0758244	0.00362342	0.283602	0	0	0	5.71615	2.67032	9.41536	0.928927	0.320957	1.96197	0.20171	0.0224368	0.686812	0.755151	0.131693	2.24228	0.688832	0.113539	2.0143	0.201124	0.0331551	0.624335	2.82734	1.26131
North America, High Income	1995	sm	6.73964	3.23248	10.9732	1.12327	0.394036	2.35659	0.215384	0.0237311	0.734994	0.925689	0.17015	2.6929	0.861374	0.145411	2.49265	0.238837	0.0409811	0.725533	3.30737	1.50881	5.5985	0.0677182	0.00342195	0.252279	0	0	0	5.49286	2.59474	9.0106	0.871823	0.3022	1.84193	0.201121	0.0224679	0.686292	0.686126	0.119398	2.04943	0.706509	0.117786	2.05717	0.192336	0.0324525	0.589412	2.72277	1.23152
North America, High Income	2000	sm	6.26927	3.01406	10.2385	1.00846	0.350099	2.14797	0.213801	0.0219847	0.740783	0.828375	0.148338	2.45841	0.854247	0.144612	2.47854	0.223195	0.0377004	0.681536	3.08282	1.41128	5.22897	0.0583672	0.00298221	0.221245	0	0	0	5.25039	2.48428	8.6437	0.801725	0.27487	1.71977	0.207487	0.022007	0.716813	0.625006	0.1057	1.90621	0.716309	0.119638	2.09301	0.183875	0.030537	0.566905	2.60878	1.18374
North America, High Income	2005	sm	5.80225	2.74569	9.42865	0.89764	0.299775	1.93539	0.217348	0.0198296	0.770583	0.727179	0.121309	2.18481	0.841699	0.140169	2.43044	0.206464	0.0329551	0.635538	2.86155	1.29123	4.82452	0.0503689	0.00246142	0.1918	0	0	0	5.03926	2.34906	8.24832	0.741312	0.244921	1.60611	0.216476	0.0205055	0.764883	0.570944	0.0899714	1.75788	0.731191	0.120343	2.12439	0.178026	0.0280208	0.551923	2.50922	1.12287
North America, High Income	2010	sm	5.55753	2.54574	9.12447	0.838926	0.262933	1.8636	0.226298	0.0177569	0.834631	0.641705	0.0949712	2.00766	0.861064	0.138883	2.51086	0.197487	0.0285756	0.626012	2.74592	1.2001	4.67621	0.046131	0.00204628	0.179212	0	0	0	4.90495	2.21426	8.10725	0.701709	0.217685	1.56498	0.221267	0.0178817	0.815883	0.516637	0.0726184	1.65022	0.757549	0.120751	2.22241	0.175089	0.0250735	0.558787	2.44578	1.06045
North America, High Income	2015	sm	5.42663	2.36665	9.04393	0.780744	0.223401	1.80406	0.247159	0.0159671	0.953085	0.589177	0.0736331	1.92975	0.885629	0.136156	2.62053	0.193284	0.0243466	0.640756	2.68758	1.11878	4.64419	0.0430519	0.00164194	0.170107	0	0	0	4.72815	2.03172	7.93061	0.64047	0.18137	1.48553	0.235758	0.0155857	0.911215	0.472758	0.0562639	1.57516	0.766963	0.116362	2.28306	0.170801	0.0213179	0.569499	2.36185	0.975008
North America, High Income	2020	sm	5.54684	2.27788	9.42792	0.76307	0.195799	1.84711	0.276668	0.0142079	1.1207	0.566914	0.0580717	1.96513	0.94542	0.137011	2.85319	0.201804	0.021627	0.709144	2.75082	1.07715	4.8497	0.0421457	0.00132004	0.172286	0	0	0	4.59478	1.85738	7.86048	0.587684	0.148952	1.42965	0.249674	0.0129281	1.01634	0.431877	0.0422709	1.52145	0.778507	0.111093	2.36356	0.167876	0.0177526	0.594248	2.2984	0.891853
HIC & East and Central Europe	1990	blind	1.2102	0.496813	2.15793	0.301979	0.0911348	0.690878	0.0361995	0.00272386	0.142636	0.242633	0.0366323	0.785607	0.258156	0.042123	0.82514	0.166447	0.026235	0.543526	0.156575	0.05572	0.316176	0.0482085	0.00171082	0.210039	0	0	0	1.13902	0.426219	2.09505	0.287796	0.0785272	0.680144	0.0360026	0.00251149	0.145401	0.220203	0.0287832	0.74991	0.242606	0.0348042	0.810898	0.154803	0.0215777	0.528571	0.147157	0.0476756
HIC & East and Central Europe	1995	blind	1.11327	0.478697	1.94663	0.272771	0.0851311	0.616224	0.036279	0.0028625	0.140825	0.217576	0.0337076	0.700659	0.250637	0.042979	0.782751	0.150889	0.0248126	0.484649	0.144429	0.0538646	0.285741	0.0406914	0.00152869	0.172254	0	0	0	1.00523	0.391034	1.81932	0.246362	0.0690447	0.577409	0.0342439	0.00247466	0.136495	0.189006	0.024929	0.643823	0.226521	0.0336997	0.743618	0.137399	0.0198331	0.462809	0.130367	0.0439551
HIC & East and Central Europe	2000	blind	0.987633	0.438425	1.69819	0.229966	0.0726946	0.517312	0.0349343	0.00271246	0.134902	0.186215	0.0286226	0.601303	0.240489	0.0430348	0.731188	0.134675	0.0225095	0.427137	0.12851	0.049488	0.249809	0.0328439	0.00125979	0.135071	0	0	0	0.886843	0.35392	1.5864	0.207398	0.0584213	0.486433	0.0329372	0.00235424	0.130949	0.160858	0.0208047	0.552063	0.209168	0.0318844	0.677648	0.121008	0.0175614	0.406211	0.115391	0.0399396
HIC & East and Central Europe	2005	blind	0.894396	0.398748	1.52348	0.203524	0.0629089	0.459744	0.0321207	0.00234283	0.123794	0.163978	0.0237081	0.536603	0.226667	0.0405504	0.682747	0.123752	0.0200487	0.392916	0.116651	0.0451168	0.224578	0.0277021	0.00102942	0.112168	0	0	0	0.794071	0.317723	1.40874	0.178709	0.0490097	0.422306	0.0319965	0.00213431	0.127625	0.138391	0.0166173	0.48306	0.197248	0.0300057	0.63345	0.109	0.0152102	0.367652	0.103585	0.0359541
HIC & East and Central Europe	2010	blind	0.846971	0.371478	1.44936	0.188085	0.0549641	0.436743	0.0318728	0.00205689	0.125172	0.146954	0.018959	0.49761	0.227687	0.0402439	0.687005	0.117359	0.0176709	0.381966	0.110596	0.0420757	0.213861	0.0244167	0.000825707	0.0989253	0	0	0	0.730458	0.287497	1.30387	0.160289	0.0417675	0.388846	0.030657	0.00181726	0.124868	0.119598	0.0127062	0.433778	0.192041	0.0286044	0.620381	0.101119	0.0131306	0.349901	0.0954571	0.0325921
HIC & East and Central Europe	2015	blind	0.799856	0.337984	1.39362	0.170755	0.0458832	0.414716	0.0315323	0.00170762	0.129811	0.132802	0.0147727	0.472604	0.228213	0.0389259	0.697746	0.109871	0.0147083	0.371885	0.104535	0.0383082	0.205812	0.0221482	0.000647667	0.0921995	0	0	0	0.660476	0.249419	1.20259	0.137255	0.0327653	0.348639	0.0305207	0.00153914	0.130393	0.103154	0.00940464	0.393304	0.180822	0.0257647	0.595792	0.0916193	0.0105628	0.330221	0.0864824	0.0283314
HIC & East and Central Europe	2020	blind	0.757772	0.304031	1.34408	0.154762	0.037371	0.394265	0.0339293	0.00151424	0.144797	0.121152	0.0113796	0.453032	0.224623	0.0364399	0.697821	0.103842	0.0120113	0.366546	0.0991713	0.0345094	0.198764	0.0202922	0.000488808	0.086852	0	0	0	0.59819	0.214447	1.10398	0.116866	0.0250902	0.309723	0.0309616	0.00129275	0.13725	0.0899438	0.00686689	0.358854	0.170229	0.0229006	0.568671	0.0834331	0.00829702	0.312505	0.0784652	0.024403
HIC & East and Central Europe	1990	sm	7.36343	3.33854	12.2843	1.32803	0.440977	2.86704	0.224651	0.0199245	0.837304	1.01829	0.156781	3.17125	0.832876	0.115764	2.6969	0.276078	0.0388833	0.924159	3.57719	1.53004	6.25674	0.106305	0.00393963	0.403094	0	0	0	6.98797	2.98799	11.9919	1.26089	0.393838	2.80397	0.224772	0.0190984	0.855631	0.923043	0.128202	3.00632	0.796419	0.101767	2.67896	0.259319	0.0335044	0.898881	3.39806	1.36449
HIC & East and Central Europe	1995	sm	7.07728	3.32645	11.6723	1.25228	0.425952	2.69614	0.231265	0.021587	0.84982	0.950572	0.151167	2.95736	0.842004	0.122692	2.67756	0.258462	0.0379951	0.851681	3.45128	1.5371	5.94639	0.0914177	0.00368939	0.339264	0	0	0	6.50016	2.87809	11.0558	1.1329	0.362558	2.51976	0.223824	0.0198343	0.843891	0.830387	0.11812	2.71352	0.785328	0.104448	2.6095	0.240099	0.0322544	0.82414	3.17791	1.32937
HIC & East and Central Europe	2000	sm	6.59107	3.15378	10.8255	1.10234	0.375717	2.39163	0.235582	0.0215141	0.868328	0.85566	0.134747	2.69258	0.849972	0.127759	2.6704	0.242191	0.0358218	0.794788	3.22879	1.4691	5.52285	0.0765338	0.00323449	0.28251	0	0	0	6.03954	2.71659	10.2136	1.00097	0.319736	2.24227	0.227365	0.0197557	0.857563	0.743521	0.103852	2.45658	0.766484	0.103828	2.52484	0.221765	0.0297328	0.758893	2.96768	1.26683
HIC & East and Central Europe	2005	sm	6.22657	2.97019	10.2172	1.01252	0.336912	2.22716	0.227402	0.0189754	0.847446	0.787837	0.117949	2.51902	0.840475	0.126248	2.62826	0.230845	0.0329873	0.764637	3.06076	1.39071	5.2207	0.0667279	0.00274056	0.247491	0	0	0	5.66885	2.54078	9.5723	0.900578	0.279631	2.04751	0.232564	0.0185808	0.889045	0.669887	0.0879556	2.25785	0.760956	0.102894	2.49795	0.209145	0.026889	0.723151	2.797	1.19284
HIC & East and Central Europe	2010	sm	6.06373	2.83185	10.0514	0.962883	0.303778	2.18145	0.234776	0.0171473	0.900834	0.722445	0.0984501	2.39042	0.872442	0.129287	2.74244	0.225607	0.0298766	0.765422	2.98516	1.32779	5.14189	0.0604224	0.00232551	0.228173	0	0	0	5.41982	2.37675	9.23769	0.83594	0.246337	1.95379	0.232884	0.0162721	0.915051	0.599616	0.0707374	2.09855	0.772163	0.102258	2.55412	0.201483	0.0239864	0.714708	2.68186	1.12076
HIC & East and Central Europe	2015	sm	5.9169	2.65527	9.93719	0.898495	0.261113	2.11125	0.244039	0.0146771	0.970156	0.675921	0.0798878	2.32756	0.904178	0.129653	2.86847	0.220142	0.025795	0.775728	2.91784	1.24652	5.09199	0.0562929	0.00190471	0.217195	0	0	0	5.13338	2.15124	8.86148	0.746057	0.201018	1.80847	0.245531	0.0142866	1.00038	0.543474	0.0549511	1.98049	0.764131	0.0969775	2.55717	0.19242	0.0201274	0.708074	2.54858	1.01925
HIC & East and Central Europe	2020	sm	5.84268	2.4691	10.0275	0.840985	0.218453	2.0769	0.274042	0.0131936	1.14117	0.643891	0.0633875	2.33657	0.925279	0.126319	2.9875	0.218111	0.0217877	0.809742	2.88696	1.16072	5.14914	0.0534123	0.0014748	0.213278	0	0	0	4.87998	1.91805	8.58823	0.661535	0.158434	1.68221	0.262624	0.0122492	1.11922	0.496829	0.0414903	1.90709	0.754691	0.0902249	2.57288	0.184972	0.0163528	0.716867	2.42954	0.911882
[truncated: 34 more columns]
